# Supplementary material for: Neighborhood Characteristics and the Mental Health of Caregivers Cohabiting with Care Recipients Diagnosed with Alzheimer’s Disease
Source: MDPI journal article supplement (doi:10.3390/ijerph18030913), 2021-01-21
Supplement: s1 [file s1]

**Supplemental Table 1.** Comparing caregiver demographics between those in the study sample vs. the full sample, 2010.

| Caregiver Demographics             | Cohabited Caregivers<br>from Study Sample<br>( <i>n</i> = 212) | All Cohabited Caregivers<br>from the Registry<br>Subsample<br>( <i>n</i> = 224) |
|------------------------------------|----------------------------------------------------------------|---------------------------------------------------------------------------------|
|                                    | <i>N</i> (Percentage)                                          | <i>N</i> (Percentage)                                                           |
| CESD score, mean (S.D.)            | 10.2 ± 6.31                                                    | 10.2 ± 6.4                                                                      |
| ZBI score, mean (S.D.)             | 5.9 ± 3.9                                                      | 5.8 ± 3.9                                                                       |
| NPI-Q-CD, mean (S.D.)              | 12.1 ± 10.4                                                    | 12.3 ± 10.6                                                                     |
| Age, mean (S.D.)                   | 58.9 ± 11.1                                                    | 58.8 ± 10.2                                                                     |
| Sex/Gender                         |                                                                |                                                                                 |
| Male                               | 31 (14.6)                                                      | 33 (14.8)                                                                       |
| Female                             | 181 (85.3)                                                     | 191 (85.2)                                                                      |
| Race/Ethnicity                     |                                                                |                                                                                 |
| Non-Hispanic Black                 | 117 (55.1)                                                     | 124 (55.1)                                                                      |
| Other <sup>a</sup>                 | 95 (44.8)                                                      | 100 (44.8)                                                                      |
| Employment                         |                                                                |                                                                                 |
| Employed                           | 70 (33.0)                                                      | 72 (32.2)                                                                       |
| Retired/Unemployed                 | 113 (53.3)                                                     | 120 (53.9)                                                                      |
| Other <sup>b</sup>                 | 29 (13.6)                                                      | 32 (13.9)                                                                       |
| Relationship to the Care Recipient |                                                                |                                                                                 |
| Spouse                             | 35 (16.5)                                                      | 36 (16.1)                                                                       |
| Child                              | 144 (67.9)                                                     | 152 (67.7)                                                                      |
| Other <sup>c</sup>                 | 33 (15.5)                                                      | 36 (16.1)                                                                       |

<sup>a</sup> “Other” race/ethnicity included non-Hispanic white, Hispanic/Latinx, and Asian.

<sup>b</sup> Retired and unemployed included fully retired, unemployed, and homemaker, and employed included employed full time, employed part time, and retired but working part time.

<sup>c</sup> “Other” relationship to care recipient included daughter-in-law, sister, brother, grandchild, niece or nephew, and other.

NPI-Q-CD: Neuropsychiatric Inventory Questionnaire- Caregiver Distress, CESD: Center for Epidemiologic Studies Depression Scale, ZBI: Zarit Burden Interview.

**Supplemental Table 2.** Instruments used to measure the caregivers' mental health outcomes.

| <b>Instrument</b>                                                  | <b>0</b>                       | <b>1</b>               | <b>2</b>         | <b>3</b>                | <b>4</b>                 | <b>5</b>                         | <b>Range</b> |
|--------------------------------------------------------------------|--------------------------------|------------------------|------------------|-------------------------|--------------------------|----------------------------------|--------------|
| Center for Epidemiologic Studies Depression Scale–Revised          | Rarely/<br>None of<br>the time | Some<br>of the<br>time | Occasion<br>ally | Most of<br>the<br>time  | n/a                      | n/a                              | 0–<br>30     |
| Zarit Burden Interview                                             | Never                          | Rarel<br>y             | Sometim<br>es    | Quite<br>frequen<br>tly | Near<br>ly<br>alwa<br>ys | n/a                              | 0–<br>16     |
| Neuro-Psychiatric Inventory<br>Questionnaire Caregiver<br>Distress | Not<br>distressin<br>g at all  | Mini<br>mal            | Mild             | Modera<br>te            | Seve<br>re               | Extrem<br>e or<br>very<br>severe | 0–<br>60     |

**Supplemental Table 3.** Mean scores of the NPI-Q domains in care recipients with Alzheimer's disease, 2010 ( $n = 212$ ).<sup>a</sup>

| <b>NPI Domain</b>                | <b>Mean <math>\pm</math> S.D.<sup>b</sup></b> |
|----------------------------------|-----------------------------------------------|
| NPI total score                  | 26.3 $\pm$ 22.3                               |
| Delusions                        | 1.8 $\pm$ 3.1                                 |
| Hallucinations                   | 1.9 $\pm$ 3.1                                 |
| Agitation/aggression             | 3.1 $\pm$ 3.5                                 |
| Depression/dysphoria             | 2.3 $\pm$ 3.5                                 |
| Anxiety                          | 1.7 $\pm$ 3.1                                 |
| Euphoria/elation                 | 0.7 $\pm$ 1.7                                 |
| Apathy                           | 2.8 $\pm$ 3.7                                 |
| Disinhibition                    | 1.3 $\pm$ 2.7                                 |
| Irritability                     | 2.8 $\pm$ 3.7                                 |
| Motor disturbances               | 2.8 $\pm$ 3.7                                 |
| Sleep and nighttime disturbances | 2.7 $\pm$ 3.8                                 |
| Appetite/eating change           | 1.9 $\pm$ 3.3                                 |

<sup>a</sup> NPI-Q is the Neuropsychiatric Inventory Questionnaire that assesses neuropsychiatric symptoms.

<sup>b</sup> S.D.: standard deviation.

**Supplemental Table 4.** Unadjusted and adjusted prevalence ratios (PRs) of caregiver depressive symptoms by neighborhood characteristics as defined at the 3-mile buffer, 2010.

| Variable                             | Severe Neuropsychiatric Symptoms ( <i>n</i> = 112) <sup>c</sup> |                          | Non-Severe Neuropsychiatric Symptoms ( <i>n</i> = 100) <sup>c</sup> |                          |
|--------------------------------------|-----------------------------------------------------------------|--------------------------|---------------------------------------------------------------------|--------------------------|
|                                      | Unadjusted PR                                                   | Adjusted PR <sup>d</sup> | Unadjusted PR                                                       | Adjusted PR <sup>d</sup> |
|                                      | (95% CI)                                                        | (95% CI)                 | (95% CI)                                                            | (95% CI)                 |
| Rurality <sup>a</sup>                |                                                                 |                          |                                                                     |                          |
| Rural                                | 1.05 (0.83–1.35)                                                | 0.98 (0.75–1.27)         | 0.88 (0.65–1.22)                                                    | 0.98 (0.69–1.39)         |
| Small urban                          | 0.89 (0.66–1.19)                                                | 0.96 (0.71–1.28)         | 0.89 (0.62–1.28)                                                    | 1.02 (0.68–1.51)         |
| Large urban                          | 1.00 <sup>e</sup>                                               | 1.00 <sup>e</sup>        | 1.00 <sup>e</sup>                                                   | 1.00 <sup>e</sup>        |
| Percent moved 1 year ago             | 1.03 (0.95–1.12)                                                | 1.04 (0.95–1.12)         | 0.98 (0.89–1.09)                                                    | 0.98 (0.89–1.09)         |
| Median household income <sup>b</sup> |                                                                 |                          |                                                                     |                          |
| Low                                  | 1.18 (0.91–1.53)                                                | 1.33 (1.00–1.78)         | 0.82 (0.59–1.14)                                                    | 0.80 (0.56–1.17)         |
| Medium                               | 1.19 (0.93–1.54)                                                | 1.25 (0.97–1.61)         | 0.74 (0.53–1.05)                                                    | 0.77 (0.53–1.12)         |
| High                                 | 1.00 <sup>e</sup>                                               | 1.00 <sup>e</sup>        | 1.00 <sup>e</sup>                                                   | 1.00 <sup>e</sup>        |

<sup>a</sup> Rurality was measured based on the RUCA (Rural-Urban Commuting Area codes). A “large urban” area was defined as a metropolitan area; a “small urban” area was defined as a metropolitan area with high commuting or a metropolitan area with low commuting; a “rural” area was defined as a micropolitan area core, micropolitan area with high commuting, micropolitan area with low commuting, small town core, small town with high commuting, small town with low commuting, or rural areas.

<sup>b</sup> Median household income categories were based on tertiles, where “low” was <\$34,352, “medium” was \$34,352–41,927, and “high” was >\$41,927.

<sup>c</sup> Severe neuropsychiatric symptoms among those with AD were defined as >median.

<sup>d</sup> Model was adjusted for caregiver age, sex/gender, race/ethnicity, employment, relationship to the care recipient, and sandwich caregiver status.

<sup>e</sup> Reference category.

**Supplemental Table 5.** Unadjusted and adjusted prevalence ratios of caregiver burden by neighborhood characteristics as defined at the 3-mile buffer, 2010.

| Variable                             | Severe Neuropsychiatric Symptoms ( <i>n</i> = 112) <sup>c</sup> |                          | Non-Severe Neuropsychiatric Symptoms ( <i>n</i> = 100) <sup>c</sup> |                          |
|--------------------------------------|-----------------------------------------------------------------|--------------------------|---------------------------------------------------------------------|--------------------------|
|                                      | Unadjusted PR                                                   | Adjusted PR <sup>d</sup> | Unadjusted PR                                                       | Adjusted PR <sup>d</sup> |
|                                      | (95% CI)                                                        | (95% CI)                 | (95% CI)                                                            | (95% CI)                 |
| Rurality <sup>a</sup>                |                                                                 |                          |                                                                     |                          |
| Rural                                | 0.87 (0.67–1.12)                                                | 0.87 (0.65–1.17)         | 0.89 (0.60–1.32)                                                    | 0.99 (0.65–1.51)         |
| Small urban                          | 0.93 (0.68–1.25)                                                | 1.02 (0.74–1.40)         | 0.86 (0.55–1.36)                                                    | 0.94 (0.59–1.50)         |
| Large urban                          | 1.00 <sup>e</sup>                                               | 1.00 <sup>e</sup>        | 1.00 <sup>e</sup>                                                   | 1.00 <sup>e</sup>        |
| Percent moved 1 year ago             | 1.03 (0.95–1.11)                                                | 1.02 (0.94–1.11)         | 0.96 (0.85–1.09)                                                    | 0.95 (0.83–1.07)         |
| Median household income <sup>b</sup> |                                                                 |                          |                                                                     |                          |
| Low                                  | 0.91 (0.70–1.19)                                                | 1.05 (0.77–1.33)         | 0.88 (0.59–1.33)                                                    | 0.90 (0.57–1.44)         |
| Medium                               | 0.94 (0.72–1.22)                                                | 1.01 (0.77–1.33)         | 0.65 (0.42–1.00)                                                    | 0.74 (0.47–1.17)         |
| High                                 | 1.00 <sup>e</sup>                                               | 1.00 <sup>e</sup>        | 1.00 <sup>e</sup>                                                   | 1.00 <sup>e</sup>        |

<sup>a</sup> Rurality was measured based on the RUCA (Rural-Urban Commuting Area codes). A “large urban” area was defined as a metropolitan area; a “small urban” area was defined as a metropolitan area with high commuting or a metropolitan area with low commuting; a “rural” area was defined as a micropolitan area core, micropolitan area with high commuting, micropolitan area with low commuting, small town core, small town with high commuting, small town with low commuting, or rural areas.

<sup>b</sup> Median household income categories were based on tertiles, where “low” was <\$34,352, “medium” was \$34,352–41,927, and “high” was >\$41,927.

<sup>c</sup> Severe neuropsychiatric symptoms among those with AD were defined as >median.

<sup>d</sup> Model was adjusted for caregiver age, sex/gender, race/ethnicity, employment, relationship to the care recipient, and sandwich caregiver status.

<sup>e</sup> Reference category.

**Supplemental Table 6.** Unadjusted and adjusted prevalence ratios of caregiver distress by neighborhood characteristics as defined at the 3-mile buffer, 2010.

| Variable                             | Severe Neuropsychiatric Symptoms ( <i>n</i> = 112) <sup>c</sup> |                                   | Non-Severe Neuropsychiatric Symptoms ( <i>n</i> = 100) <sup>c</sup> |                                   |
|--------------------------------------|-----------------------------------------------------------------|-----------------------------------|---------------------------------------------------------------------|-----------------------------------|
|                                      | Unadjusted PR (95% CI)                                          | Adjusted PR <sup>d</sup> (95% CI) | Unadjusted PR (95% CI)                                              | Adjusted PR <sup>d</sup> (95% CI) |
| Rurality <sup>a</sup>                |                                                                 |                                   |                                                                     |                                   |
| Rural                                | 0.87 (0.67–1.12)                                                | 0.76 (0.61–0.95)                  | 0.89 (0.59–1.32)                                                    | 0.53 (0.29–1.01)                  |
| Small urban                          | 0.93 (0.68–1.25)                                                | 0.89 (0.70–1.15)                  | 0.87 (0.55–1.36)                                                    | 0.63 (0.31–1.27)                  |
| Large urban                          | 1.00 <sup>e</sup>                                               | 1.00 <sup>e</sup>                 | 1.00 <sup>e</sup>                                                   | 1.00 <sup>e</sup>                 |
| Percent moved 1 year ago             | 1.02 (0.95–1.11)                                                | 0.99 (0.92–1.05)                  | 0.96 (0.85–1.09)                                                    | 0.93 (0.78–1.11)                  |
| Median household income <sup>b</sup> |                                                                 |                                   |                                                                     |                                   |
| Low                                  | 0.91 (0.69–1.19)                                                | <b>1.61 (1.26–2.04)</b>           | 0.88 (0.59–1.33)                                                    | 1.50 (0.73–3.08)                  |
| Medium                               | 0.94 (0.72–1.22)                                                | <b>1.45 (1.17–1.78)</b>           | 0.65 (0.42–0.99)                                                    | 1.20 (0.63–2.28)                  |
| High                                 | 1.00 <sup>e</sup>                                               | 1.00 <sup>e</sup>                 | 1.00 <sup>e</sup>                                                   | 1.00 <sup>e</sup>                 |

<sup>a</sup> Rurality was measured based on the RUCA (Rural-Urban Commuting Area codes). A “large urban” area was defined as a metropolitan area; a “small urban” area was defined as a metropolitan area with high commuting or a metropolitan area with low commuting; a “rural” area was defined as a micropolitan area core, micropolitan area with high commuting, micropolitan area with low commuting, small town core, small town with high commuting, small town with low commuting, or rural areas.

<sup>b</sup> Median household income categories were based on tertiles, where “low” was <\$34,352, “medium” was \$34,352–41,927, and “high” was >\$41,927.

<sup>c</sup> Severe neuropsychiatric symptoms among those with AD was defined as >median.

<sup>d</sup> Model was adjusted for caregiver age, sex/gender, race/ethnicity, employment, relationship to the care recipient, and sandwich caregiver status.

<sup>e</sup> Reference category.

Bolded estimates indicate statistical significance.

**Supplemental Table 7.** Unadjusted and adjusted prevalence ratios of caregiver depressive symptoms by neighborhood characteristics as defined at the 1-mile buffer, 2010.

| <b>Variable</b>                      | <b>Unadjusted PR (95% CI)</b> | <b>Adjusted PR (95% CI) <sup>d</sup></b> |
|--------------------------------------|-------------------------------|------------------------------------------|
| Rurality <sup>a</sup>                |                               |                                          |
| Rural                                | 0.96 (0.78–1.17)              | 0.97 (0.77–1.21)                         |
| Small urban                          | 0.86 (0.68–1.09)              | 0.91 (0.71–1.16)                         |
| Large urban                          | 1.00 <sup>c</sup>             | 1.00 <sup>c</sup>                        |
| Percent moved 1 year ago             | 1.01 (0.94–1.08)              | 1.00 (0.94–1.07)                         |
| Median household income <sup>b</sup> |                               |                                          |
| Low                                  | 0.99 (0.80–1.23)              | 1.04 (0.83–1.32)                         |
| Medium                               | 0.99 (0.79–1.23)              | 1.04 (0.83–1.30)                         |
| High                                 | 1.00 <sup>c</sup>             | 1.00 <sup>c</sup>                        |

<sup>a</sup> Rurality was measured based on the RUCA (Rural-Urban Commuting Area codes). A “large urban” area was defined as a metropolitan area; a “small urban” area was defined as a metropolitan area with high commuting or a metropolitan area with low commuting; a “rural” area was defined as a micropolitan area core, micropolitan area with high commuting, micropolitan area with low commuting, small town core, small town with high commuting, small town with low commuting, or rural areas.

<sup>b</sup> Median household income categories were based on tertiles, where “low” was <\$31,000, “medium” was \$31,000–40,758, and “high” was >\$40,758.

<sup>c</sup> Reference category.

<sup>d</sup> Model was adjusted for caregiver age, sex/gender, race/ethnicity, employment, relationship to the care recipient, and sandwich caregiver status.

**Supplemental Table 8.** Unadjusted and adjusted prevalence ratios of caregiver burden by neighborhood characteristics as defined at the 1-mile buffer, 2010.

| <b>Variable</b>                      | <b>Unadjusted PR (95% CI)</b> | <b>Adjusted PR (95% CI)<sup>d</sup></b> |
|--------------------------------------|-------------------------------|-----------------------------------------|
| Rurality <sup>a</sup>                |                               |                                         |
| Rural                                | 0.84 (0.67–1.06)              | 0.89 (0.69–1.15)                        |
| Small urban                          | 0.86 (0.65–1.13)              | 0.93 (0.70–1.22)                        |
| Large urban                          | 1.00 <sup>c</sup>             | 1.00 <sup>c</sup>                       |
| Percent moved 1 year ago             | 1.00 (0.93–1.07)              | 0.98 (0.91–1.05)                        |
| Median household income <sup>b</sup> |                               |                                         |
| Low                                  | 0.88 (0.69–1.12)              | 1.00 (0.77–1.31)                        |
| Medium                               | 0.82 (0.64–1.05)              | 0.94 (0.73–1.21)                        |
| High                                 | 1.00 <sup>c</sup>             | 1.00 <sup>c</sup>                       |

<sup>a</sup> Rurality was measured based on the RUCA (Rural-Urban Commuting Area codes). A “large urban” area was defined as a metropolitan area; a “small urban” area was defined as a metropolitan area with high commuting or a metropolitan area with low commuting; a “rural area” was defined as a micropolitan area core, micropolitan area with high commuting, micropolitan area with low commuting, small town core, small town with high commuting, small town with low commuting, or rural areas.

<sup>b</sup> Median household income categories were based on tertiles, where “low” was <\$31,000, “medium” was \$31,000–40,758, and “high” was >\$40,758.

<sup>c</sup> Reference category.

<sup>d</sup> Model was adjusted for caregiver age, sex/gender, race/ethnicity, employment, relationship to the care recipient, and sandwich caregiver status



**Supplemental Table 9.** Unadjusted and adjusted prevalence ratios of caregiver distress by neighborhood characteristics as defined at the 1-mile buffer, 2010.

| Variable                             | Unadjusted PR (95% CI) | Adjusted PR (95% CI) <sup>d</sup> |
|--------------------------------------|------------------------|-----------------------------------|
| Rurality <sup>a</sup>                |                        |                                   |
| Rural                                | 0.78 (0.57–1.07)       | 0.65 (0.45–0.94)                  |
| Small urban                          | 0.78 (0.53–1.12)       | 0.71 (0.48–1.03)                  |
| Large urban                          | 1.00 <sup>c</sup>      | 1.00 <sup>c</sup>                 |
| Percent moved 1 year ago             | 0.98 (0.88–1.09)       | 0.94 (0.84–1.04)                  |
| Median household income <sup>b</sup> |                        |                                   |
| Low                                  | 1.14 (0.81–1.60)       | <b>1.55 (1.05–2.28)</b>           |
| Medium                               | 1.14 (0.81–1.59)       | <b>1.49 (1.05–2.11)</b>           |
| High                                 | 1.00 <sup>c</sup>      | 1.00 <sup>c</sup>                 |

<sup>a</sup> Rurality was measured based on the RUCA (Rural-Urban Commuting Area codes). A “large urban” area was defined as a metropolitan area; a “small urban” area was defined as a metropolitan area with high commuting or a metropolitan area with low commuting; a “rural” area was defined as a micropolitan area core, micropolitan area with high commuting, micropolitan area with low commuting, small town core, small town with high commuting, small town with low commuting, or rural areas.

<sup>b</sup> Median household income categories were based on tertiles, where “low” was <\$31,000, “medium” was \$31,000–40,758, and “high” was >\$40,758.

<sup>c</sup> Reference category.

<sup>d</sup> Model was adjusted for caregiver age, sex/gender, race/ethnicity, employment, relationship to the care recipient, and sandwich caregiver status.

Bolded estimates indicate statistical significance.

**Supplemental Table 10.** Unadjusted and adjusted prevalence ratios of caregiver depressive symptoms by neighborhood characteristics defined at the 3-mile buffer, 2010.

| <b>Variable</b>                      | <b>Unadjusted PR (95% CI)</b> | <b>Adjusted PR (95% CI)<sup>d</sup></b> |
|--------------------------------------|-------------------------------|-----------------------------------------|
| Rurality <sup>a</sup>                |                               |                                         |
| Rural                                | 0.96 (0.78–1.17)              | 0.97 (0.77–1.21)                        |
| Small urban                          | 0.86 (0.68–1.09)              | 0.91 (0.71–1.16)                        |
| Large urban                          | 1.00 <sup>c</sup>             | 1.00 <sup>c</sup>                       |
| Percent moved 1 year ago             | 1.01 (0.94–1.08)              | 1.00 (0.94–1.07)                        |
| Median household income <sup>b</sup> |                               |                                         |
| Low                                  | 0.99 (0.80–1.23)              | 1.05 (0.83–1.32)                        |
| Medium                               | 0.99 (0.79–1.23)              | 1.04 (0.83–1.30)                        |
| High                                 | 1.00 <sup>c</sup>             | 1.00 <sup>c</sup>                       |

<sup>a</sup> Rurality was measured based on the RUCA (Rural-Urban Commuting Area codes). A “large urban” area was defined as a metropolitan area; a “small urban” area was defined as a metropolitan area with high commuting or a metropolitan area with low commuting; a “rural” area was defined as a micropolitan area core, micropolitan area with high commuting, micropolitan area with low commuting, small town core, small town with high commuting, small town with low commuting, or rural areas.

<sup>b</sup> Median household income categories were based on tertiles, where “low” was <\$34,352, “medium” was \$34,352–41,927, and “high” was >\$41,927.

<sup>c</sup> Reference category.

<sup>d</sup> Model was adjusted for caregiver age, sex/gender, race/ethnicity, employment, relationship to the care recipient, and sandwich caregiver status.

**Supplemental Table 11.** Unadjusted and adjusted prevalence ratios of caregiver burden by neighborhood characteristics as defined at the 3-mile buffer, 2010.

| Variable                             | Unadjusted PR (95% CI) | Adjusted PR (95% CI) <sup>d</sup> |
|--------------------------------------|------------------------|-----------------------------------|
| Rurality <sup>a</sup>                |                        |                                   |
| Rural                                | 0.84 (0.67–1.06)       | 0.89 (0.69–1.15)                  |
| Small urban                          | 0.86 (0.65–1.13)       | 0.93 (0.70–1.22)                  |
| Large urban                          | 1.00 <sup>c</sup>      | 1.00 <sup>c</sup>                 |
| Percent moved 1 year ago             | 0.99 (0.93–1.08)       | 0.98 (0.91–1.05)                  |
| Median household income <sup>b</sup> |                        |                                   |
| Low                                  | 0.88 (0.69–1.12)       | 1.00 (0.77–1.31)                  |
| Medium                               | 0.82 (0.64–1.05)       | 0.94 (0.73–1.21)                  |
| High                                 | 1.00 <sup>c</sup>      | 1.00 <sup>c</sup>                 |

<sup>a</sup> Rurality was measured based on the RUCA (Rural-Urban Commuting Area codes). A “large urban” area was defined as a metropolitan area; a “small urban” area was defined as a metropolitan area with high commuting or a metropolitan area with low commuting; a “rural” area was defined as a micropolitan area core, micropolitan area with high commuting, micropolitan area with low commuting, small town core, small town with high commuting, small town with low commuting, or rural areas.

<sup>b</sup> Median household income categories were based on tertiles, where “low” was <\$34,352, “medium” was \$34,352–41,927, and “high” was >\$41,927.

<sup>c</sup> Reference category.

<sup>d</sup> Model was adjusted for caregiver age, sex/gender, race/ethnicity, employment, relationship to the care recipient, and sandwich caregiver status.

**Supplemental Table 12.** Unadjusted and adjusted prevalence ratios of caregiver distress by neighborhood characteristics defined at the 3-mile buffer, 2010.

| Variable                             | Unadjusted PR (95% CI) | Adjusted PR (95% CI) <sup>d</sup> |
|--------------------------------------|------------------------|-----------------------------------|
| Rurality <sup>a</sup>                |                        |                                   |
| Rural                                | 0.77 (0.57–1.07)       | 0.65 (0.45–0.94)                  |
| Small urban                          | 0.77 (0.53–1.12)       | 0.71 (0.48–1.03)                  |
| Large urban                          | 1.00 <sup>c</sup>      | 1.00 <sup>c</sup>                 |
| Percent moved 1 year ago             | 0.98 (0.88–1.09)       | 0.94 (0.84–1.04)                  |
| Median household income <sup>b</sup> |                        |                                   |
| Low                                  | 1.14 (0.81–1.59)       | <b>1.55 (1.05–2.28)</b>           |
| Medium                               | 1.14 (0.81–1.59)       | <b>1.49 (1.05–2.11)</b>           |
| High                                 | 1.00 <sup>c</sup>      | 1.00 <sup>c</sup>                 |

<sup>a</sup> Rurality was measured based on the RUCA (Rural-Urban Commuting Area codes). A “large urban” area was defined as a metropolitan area; a “small urban” area was defined as a metropolitan area with high commuting or a metropolitan area with low commuting; a “rural” area was defined as a micropolitan area core, micropolitan area with high commuting, micropolitan area with low commuting, small town core, small town with high commuting, small town with low commuting, or rural areas.

<sup>b</sup> Median household income categories were based on tertiles, where “low” was <\$34,352, “medium” was \$34,352–41,927, and “high” was >\$41,927.

<sup>c</sup> Reference category.

<sup>d</sup> Model was adjusted for caregiver age, sex/gender, race/ethnicity, employment, relationship to the care recipient, and sandwich caregiver status.

Bolded estimates indicate statistical significance.

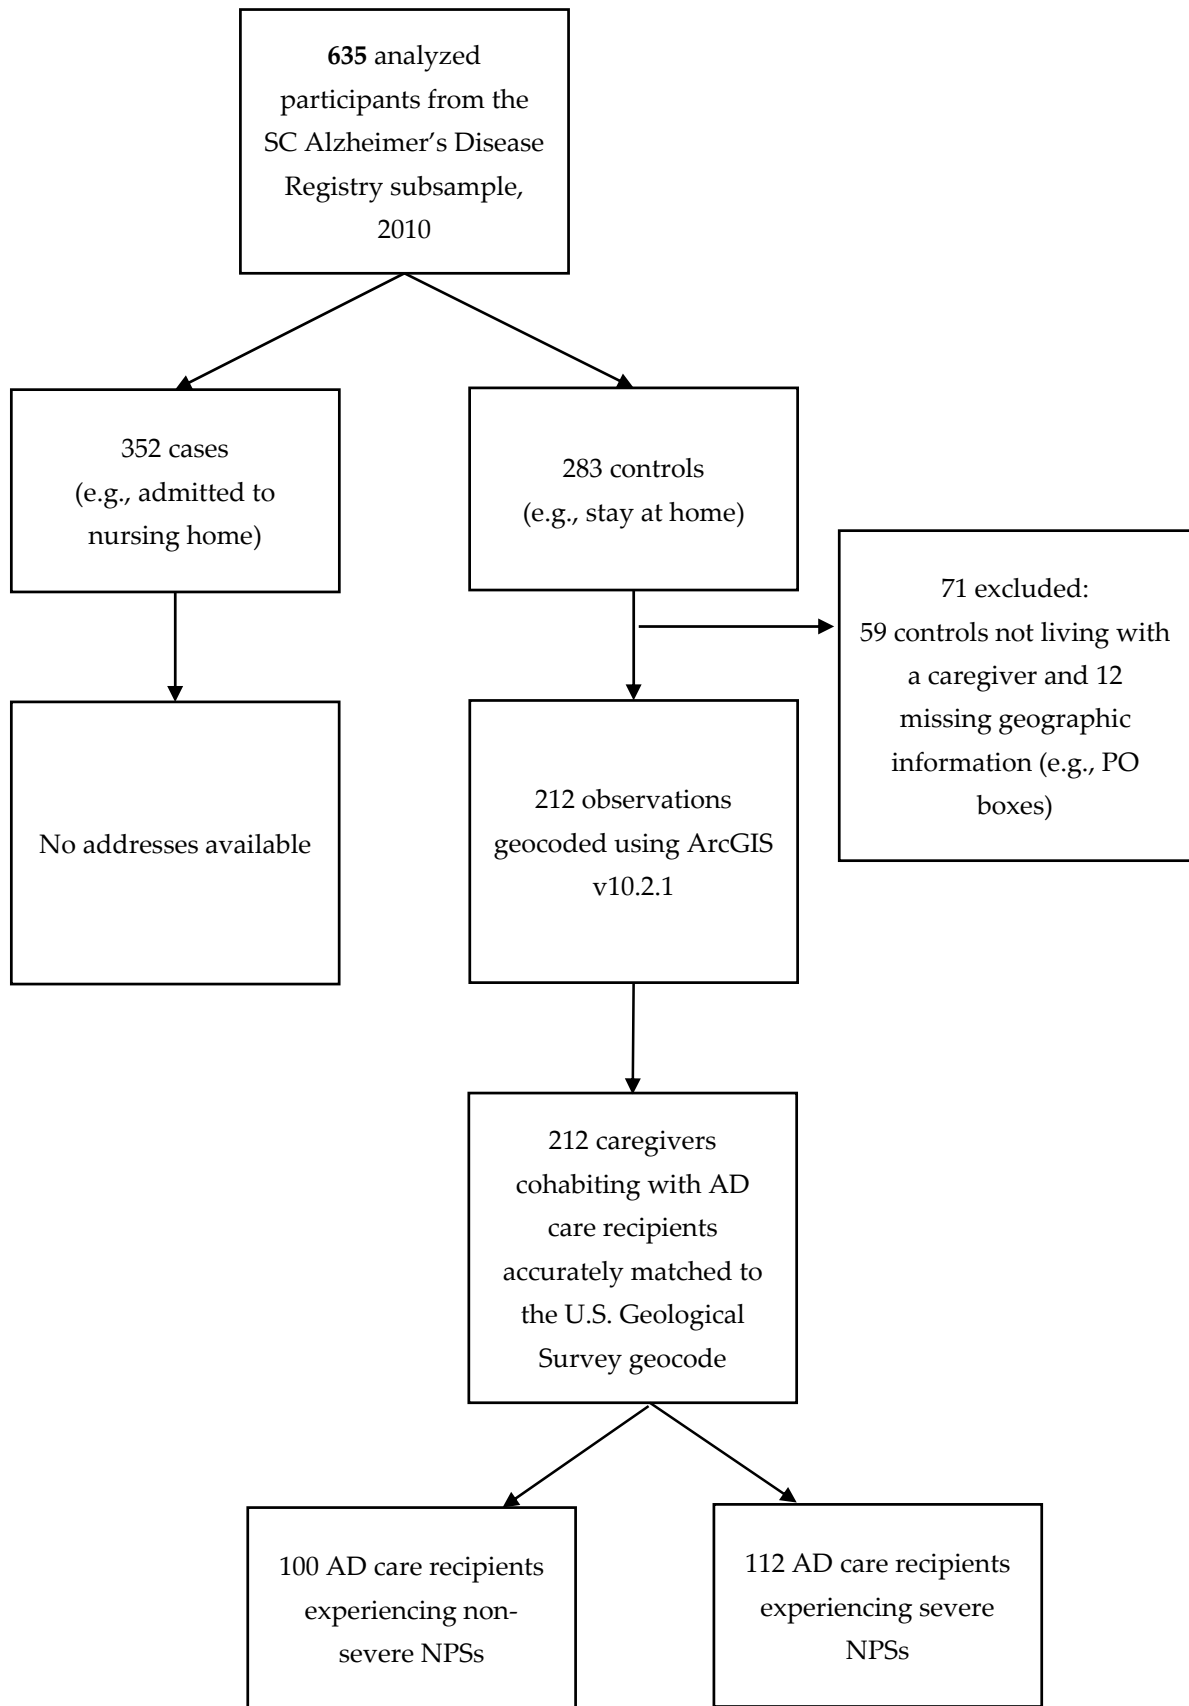

**Supplemental Figure 1.** Flowchart of the caregiver case selection, 2010. NPS: neuropsychiatric symptom.
